# 3D Quantitative Imaging of Unprocessed Live Tissue Reveals Epithelial Defense against Bacterial Adhesion and Subsequent Traversal Requires MyD88

Connie Tam<sup>1</sup>, Jeffrey LeDue<sup>1</sup>, James J. Mun<sup>2</sup>, Paul Herzmark<sup>3</sup>, Ellen A. Robey<sup>3</sup>, David J. Evans<sup>1,4</sup>, Suzanne M. J. Fleiszig<sup>1,2,5\*</sup>

**1** School of Optometry, University of California, Berkeley, California, United States of America, **2** Program in Vision Science, University of California, Berkeley, California, United States of America, **3** Department of Molecular and Cell Biology, University of California, Berkeley, California, United States of America, **4** College of Pharmacy, Touro University California, Vallejo, California, United States of America, **5** Programs in Infectious Diseases and Immunity and Microbiology, University of California, Berkeley, California, United States of America

## Abstract

While a plethora of *in vivo* models exist for studying infectious disease and its resolution, few enable factors involved in the maintenance of health to be studied *in situ*. This is due in part to a paucity of tools for studying subtleties of bacterial-host interactions at a cellular level within live organs or tissues, requiring investigators to rely on overt outcomes (e.g. pathology) in their research. Here, a suite of imaging technologies were combined to enable 3D and temporal subcellular localization and quantification of bacterial distribution within the murine cornea without the need for tissue processing or dissection. These methods were then used to demonstrate the importance of MyD88, a central adaptor protein for Toll-Like Receptor (TLR) mediated signaling, in protecting a multilayered epithelium against both adhesion and traversal by the opportunistic bacterial pathogen *Pseudomonas aeruginosa ex vivo* and *in vivo*.

**Citation:** Tam C, LeDue J, Mun JJ, Herzmark P, Robey EA, et al. (2011) 3D Quantitative Imaging of Unprocessed Live Tissue Reveals Epithelial Defense against Bacterial Adhesion and Subsequent Traversal Requires MyD88. PLoS ONE 6(8): e24008. doi:10.1371/journal.pone.0024008

**Editor:** Sunil K. Ahuja, South Texas Veterans Health Care System, United States of America

**Received:** December 9, 2010; **Accepted:** August 3, 2011; **Published:** August 25, 2011

**Copyright:** © 2011 Tam et al. This is an open-access article distributed under the terms of the Creative Commons Attribution License, which permits unrestricted use, distribution, and reproduction in any medium, provided the original author and source are credited.

**Funding:** This work was supported by the National Institutes of Health (NIH) EY011221 and AI079192 (SMJF), AI065831 (ER) and JL was supported by EY003176. The funders had no role in study design, data collection and analysis, decision to publish, or preparation of the manuscript.

**Competing Interests:** The authors have declared that no competing interests exist.

\* E-mail: fleiszig@berkeley.edu

## Introduction

Many of our tissue surfaces are lined with epithelia that are thought to be a first line defense against infection. Yet the mechanisms involved in epithelial barrier function against microbial traversal *in vivo* remain poorly understood, in part due to the paucity of suitable *in vivo* models. Attempts to understand factors that modulate microbe traversal of epithelia have been limited to *in vitro* experiments, most utilizing monolayers of cultured cells grown on permeable filters, and with an emphasis on establishing contributing virulence factors rather than determining epithelial defenses against it [1–3]. While it is known that epithelial cells do express factors with the potential to be defensive [4,5], those that actually participate in limiting bacterial trafficking through cell multilayers are yet to be determined. Moreover, relevance of *in vitro* studies using epithelial cells grown in culture to actual *in vivo* barrier function of the epithelium is not yet certain.

There have been two major obstacles to the development of *in vivo* models to study tissue traversal by microbes and the defenses that protect against it. One is that “infection” models used by most investigators are disease models in which early interactions between bacteria and the epithelium are deliberately by-passed to induce disease. Understanding factors that maintain health at the surface of epithelial-lined tissues, such as those that defend against microbial traversal, require different models, and the use of outcome measures more subtle than scoring morbidity/mortality

or quantification of total microbe load within the tissue. Related to this, the other major obstacle has been a lack of techniques for accurately localizing bacteria within live *in vivo* infected tissue. Fixation and sectioning of tissue to view microbe penetration in cross-section enables viewing of only a small area, introducing the possibility that non-representative areas are studied, or conversely, that rare but important features are missed. Other disadvantages of fixation are that it removes the opportunity to gain temporal information, and that it can impact morphology or introduce artifacts such that microbial location may be misinterpreted.

The healthy corneal epithelium at the surface of the eye usually resists bacterial adhesion, which is thought to involve the presence of surface-associated mucins [6,7]. Recently we developed a means to enable bacteria to adhere to the epithelium of mouse corneas that also allowed the epithelium’s resistance to subsequent traversal by the adherent bacteria to be manipulated. This involved blotting the epithelial surface with a lint-free tissue prior to bacterial inoculation to enable bacterial adhesion. EGTA (Ethylene Glycol Tetraacetic Acid) treatment after this blotting process can then be used to toggle on epithelial susceptibility to traversal by adhering bacteria. Since EGTA is removed (by washing) prior to bacterial inoculation, the impact of this chemical treatment on traversal is likely to involve its effects on the corneal epithelium rather than on the bacteria. EGTA, a calcium-chelator, is capable of disrupting calcium dependent cell-cell junctions [8]. However, calcium is also required for many other cell functions,

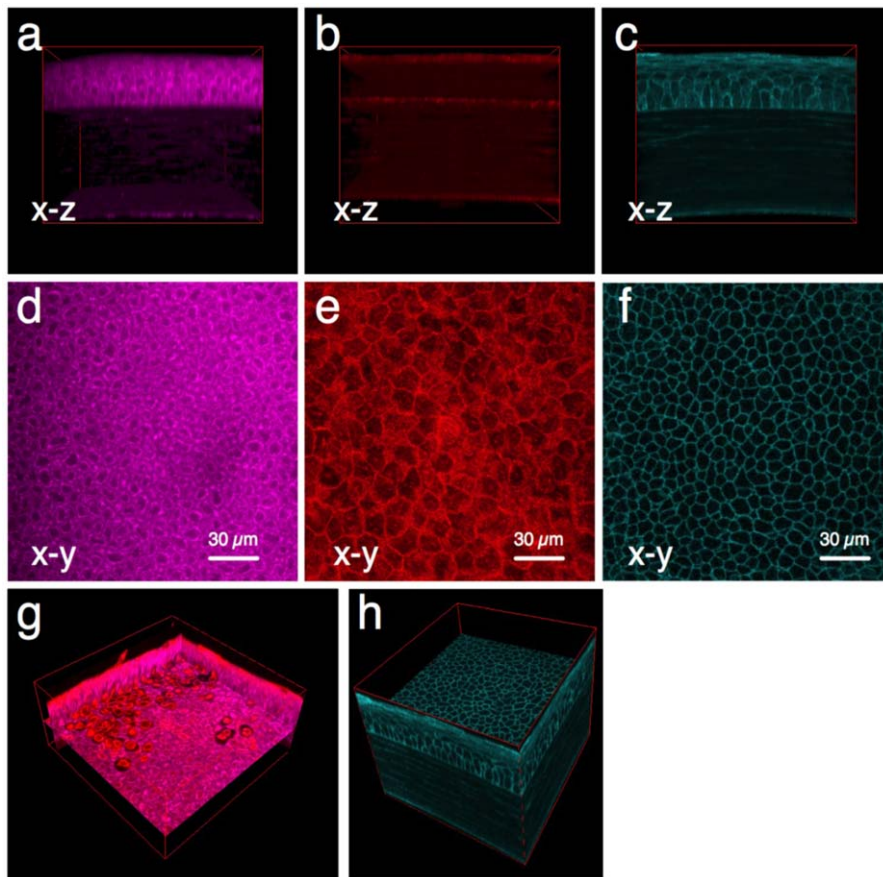

**Figure 1. 3D imaging of mouse corneas using freshly excised mouse eyeballs.** Three different techniques were used to visualize cells in all layers of the cornea. Panels (a) and (d) show two-photon excitation of cytoplasmic NAD(P)H to reveal metabolically active (live) cells in the epithelium and endothelium of the cornea by autofluorescence (magenta). Panels (b) and (e) show reflection confocal imaging (red) for localization of epithelial and endothelial cells (including live and dead cells), and collagen fibers in the stromal region (red). Panels (c) and (f) show confocal imaging of CFP-tagged cell membranes (cyan) expressed in transgenic mice. All three imaging methods enabled visualization of distinct cell layers in intact corneas of at least 150  $\mu\text{m}$  thickness (i.e. mouse). Panel (g) shows two-photon autofluorescence and reflection images overlaid to distinguish live and dead cells. Panel (h) shows that 3D images of CFP-membranes exhibit a high signal-to-background ratio providing excellent contrast for bacterial localization experiments. Field (xy) size: 189  $\mu\text{m}$  x 189  $\mu\text{m}$ . doi:10.1371/journal.pone.0024008.g001

including various innate defense responses [9]. Thus, the mechanisms by which EGTA promotes susceptibility to epithelial traversal by adherent bacteria is yet to be determined.

Toll-like receptors (TLRs) are a class of receptors that bind microbial ligands (e.g. Microbial-Associated Molecular Patterns or MAMPS) or damage-associated molecular patterns (DAMPs) to trigger innate immune responses in multiple cell types including epithelia [10–12]. While it is known that some factors made in response to TLR-mediated signaling have direct antimicrobial activities (e.g. defensins) [5,13,14], the role of these, or other factors, in limiting microbial traversal through tissue epithelia has not been directly explored using actual tissue models.

Here, we applied a suite of methods that together enable the position of bacteria within freshly excised, unfixed and unprocessed tissue to be readily visualized and quantified in 3D, and as a function of time. Using these methods, we found that MyD88, a central adaptor protein for TLR and IL-1R-dependent signaling critical in pathogen recognition, and subsequent innate immune defense responses [15], is required for epithelial resistance to both adhesion and traversal by the Gram-negative bacterium *P. aeruginosa*. These data suggest that epithelial defense against colonization *during health* involves innate defense responses that

are known to be regulated. Further, the methods and results outlined in this report advance the range of tools available for studying microbial traversal of epithelia and the host factors that normally protect against it.

## Results and Discussion

### Localization of bacteria within the epithelium of fresh whole tissue

The tissue we chose to use for this study, the corneal epithelium, is a multilayer of epithelial cells that covers the cornea of the eye. The cornea lends itself to imaging because it is both external and transparent. Epithelial cells on the corneal surface are viable (non-keratinized), and are normally bathed in fluid (tears) allowing the use of a water immersion objective with minimal disruption to normal physiology.

The healthy corneal surface does not normally bind bacteria or other microbes. Studying bacterial interactions with the corneal epithelium thus necessitates some form of manipulation to enable bacteria to adhere. As discussed above, superficial blotting with tissue paper can be used for that purpose, and it is minimally disruptive to tissue architecture [16]. Subsequent epithelial

traversal by the adherent bacteria can then be toggled on (or off), by use (or omission) of EGTA treatment after the blotting procedure.

With methods in hand to encourage bacteria to interact with the epithelium, the next goal was to develop methods for visualizing/localizing bacteria within the bacterially-challenged tissue that do not require processing (i.e. fixation, labeling, staining) of the tissue. Details of the methods utilized are outlined in the materials and methods. Briefly, bacteria were visualized using a multicopy plasmid expressing enhanced green fluorescent protein (GFP). Corneal epithelial cells within bacterially challenged, and then freshly excised unprocessed eyeballs, were imaged using one or more of three different techniques: 1) NAD(P)H autofluorescence (AF) (multiphoton, images cytoplasm of metabolically active cells). 2) A reflection technique (confocal, images both live and dead cells). 3) Use of transgenic mice expressing membrane-bound cyan fluorescent protein (CFP) (confocal, enables cell membranes to be visualized). All three methods enabled cells within all layers of the cornea (epithelium, stroma and endothelium) to be visualized (Figures 1A, B, C). Thus, it was possible to accurately localize the upper and lower limits of each layer, providing landmarks for quantifying the depth of microbe penetration using any of the three methods.

Each of the three imaging modalities had unique features for gaining more detailed information. For example, since NAD(P)H resides within the cytoplasm, the NAD(P)H AF method enables subcellular imaging; the cytoplasm fluoresces, while the nucleus and plasma membrane appear black in contrast (Figure 1D). Since its fluorescence intensity is proportional to cellular metabolic activity [17–19], this technique also provides information about the health of individual cells (Figure 1D). The reflection confocal and membrane-CFP methods each allow positive (rather than negative) visualization of epithelial cell boundaries, and thus can be used to ensure that both dead and live cells are accounted for (Figures 1E, F). Thus, when used in combination with NAD(P)H AF, confocal or membrane-CFP can enable live and dead cells to be distinguished from one another (e.g. Figure 1G). The AF and reflection methods (in contrast to membrane CFP) do not require a specific type of genetically modified animal, which means that any animal can be studied, including wild-type and all genetically modified species. Membrane-bound CFP, on the other hand, provides a high signal-to-background ratio, and consequently a high image contrast of cell membranes (Figures 1F, 1H and Video S1), compared to either AF or reflection (Figures 1D, E respectively), making this an ideal method for determining if infecting bacteria are intracellular or extracellular.

Images from bacterially-challenged corneas (6 h) are shown in Figure 2. The top panels show results for corneas that were first blotted and then treated with EGTA for 1 h prior to bacterial challenge. Both the confocal CFP membrane method (Figure 2A and Video S2) and the NAD(P)H autofluorescence method (Figure 2B and Video S3) revealed epithelial traversal by the bacteria; i.e. many bacteria were detected deep within the multilayered corneal epithelium. Consistent with our previously published findings showing that the basal lamina between the epithelium and the stroma functions as a barrier to bacterial passage [20], few bacteria were noted in the underlying stroma. Also consistent with our previous results [16], corneas that were not subsequently treated with EGTA prior to bacterial challenge (blotted only, bottom panels and Video S4) were susceptible to bacterial adhesion only, without bacterial penetration beyond the epithelial surface.

Having established methods for enabling and also visualizing bacteria deep within unprocessed and unsectioned live tissue, we

next explored if these methods could be used to provide more detailed spatial and temporal information about the traversal process and its impact. Use of the CFP membrane mouse and high magnification enabled the position of bacteria relative to cell membranes, and the status of those membranes, to be determined. For example, perusal of images in Figures 2 reveals that the CFP signal is relatively diffuse after bacterial traversal of blotted/EGTA-treated corneas relative to the very clearly localized CFP signal seen in the uninfected eye in Figure 1. Blotting/EGTA treatment used alone without bacterial challenge did not cause CFP diffusion (data not shown), suggesting that it was the bacterial traversal *per se* that impacted the appearance of the cell membrane marker; perhaps not surprising considering that *P. aeruginosa* can elaborate multiple toxins [21] and basolateral cell surfaces are highly susceptible to them [22]. Use of the CFP-membrane mouse also revealed that *P. aeruginosa* can induce the formation of membrane blebs, and can localize within them, a phenomenon which we have reported to occur when *P. aeruginosa* infects cultured corneal epithelial cells [23,24]. Figures 3A and 3B each show examples of membrane blebs; the higher magnification used in Figure 3B enabled a bacterium to be located within a bleb. While the significance of “bleb niche” formation in epithelial cells during *P. aeruginosa* infection is still under investigation, this finding that they occur in actual infected fresh tissue, and not only in cells grown and infected in tissue culture wells, lends justification to that effort.

One clear advantage of imaging live versus fixed tissues is that temporal information can be obtained using the same sample. For example, individual bacteria and cells within the epithelium of fresh tissue can be tracked over time for their location and/or their viability (Figures 3B, 3C and Video S5). Video S5 shows that the bacterium located within the membrane bleb in Figure 3B is exhibiting swimming motility inside the bleb, confirming another phenomenon that we have reported with cultured cells, but this time for a cell located within the corneal epithelium of a live eyeball. Figure 3C (high magnification z -stack) shows several bacteria in the basal (deep) layers of the corneal epithelium of intact eyeballs mostly located *between* epithelial cells. In this image moving bacteria are shown in red, while white bacteria are stationary since they were captured twice (sequentially in CFP and GFP channels) in the same z-plane (temporally spaced images were overlaid). In addition to providing insights into the temporal details of bacteria-cell interactions, these methods could also be used to monitor individual host cell responses to bacterial challenge over time (e.g. by morphology or by tracking NAD(P)H AF), and with respect to the position of individual bacteria.

Lack of significant bacterial penetration into the stroma as a result of an intact basal lamina likely explains why blotting/EGTA treatment is not sufficient to enable susceptibility to overt (clinically visible) disease despite bacterial traversal through the epithelium [16]. We next explored the usefulness of these imaging methods when there is overt disease, i.e. when the cornea becomes optically “opaque” (non-transparent) due to the infiltration of leukocytes, e.g. neutrophils and monocytes [25–27]. Disease was induced by scratching the cornea through to the level of the anterior stroma (damages basal lamina barrier) prior to challenging with bacteria [28,29]. It remained possible to detect cellular NAD(P)H AF and to localize GFP-labeled *P. aeruginosa*, even when the infecting bacteria were located deep within the stromal region of these opaque corneas (Figure 4, Video S6). The images collected revealed interesting insights illustrating the power of this technology compared to fixed/sectioned tissue. For instance, the images shown in Figures 4A, 4B and Video S6 were collected at a region of the cornea where the basal lamina was not directly

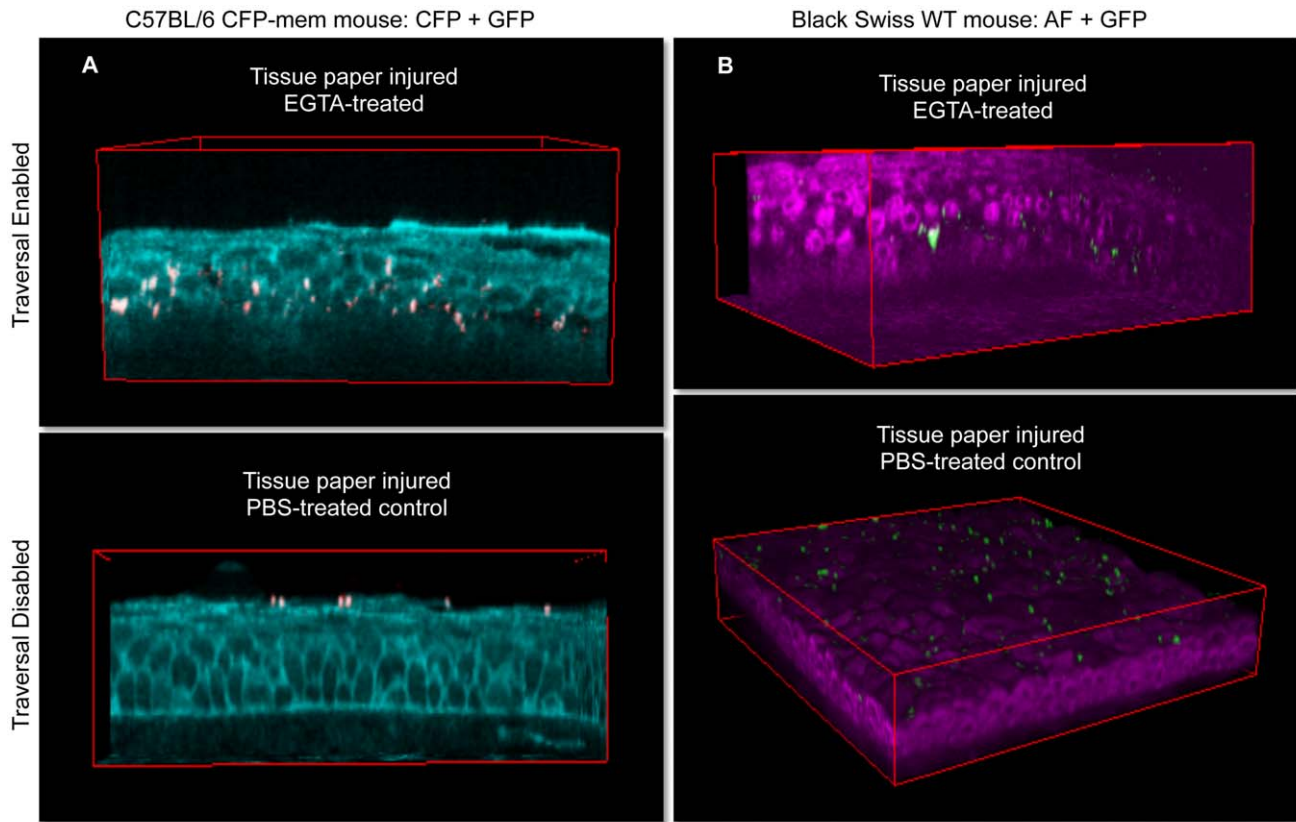

**Figure 2. 3D imaging of bacterially challenged eyeballs.** All eyeballs were tissue paper blotted to enable bacterial adherence to the corneal epithelium. Susceptibility to traversal by adherent bacteria was then toggled on/off by use/omission of EGTA treatment following the blotting procedure. Upper images (EGTA used to toggle on traversal) show deep bacterial traversal 6 h after bacterial challenge in EGTA-treated corneas. Lower images were PBS-treated controls (EGTA step omitted) and showed bacterial adherence to the surface without subsequent bacterial traversal. Panel (a) shows confocal technique using mice with CFP-tagged cell membranes (cyan), and panel (b) shows two-photon images of cellular NAD(P)H autofluorescence (magenta) in transgenic (C57BL/6 background) or wild-type (Black Swiss background) mouse corneas respectively. Field size: 189 μm × 189 μm.

doi:10.1371/journal.pone.0024008.g002

impacted by the scratching process. This z-stack was collected with the optical axis of the microscope parallel to, but laterally shifted from, the optical axis of the eye and as a result of the curvature of the eye, the image captured in Figure 4A (taken from the stack) shows the epithelium at the top and the interface between the epithelium and the stroma (basal lamina region) towards the bottom. This enabled direct visualization of the “filtering” effect of the basal lamina, i.e. bacteria can be seen deep in the epithelium arranged in circular patterns surrounding cells/nuclei with concentrations tapering off at, and under, the basal lamina. While the images collected directly under the basal lamina showed a distinct bacteria free zone, deeper regions of the stroma again revealed the presence of bacteria, this time arranged in a different pattern. Here, bacteria were found radiating out laterally in single file, end-to-end lines, corresponding with orientation of the stromal collagen fibrils (Figure 4B, Video S6). Images collected from adjacent regions showed that these bacterial “trains” originated at the scratched region where bacteria enter the corneal stroma directly through the damaged basal lamina, and then emanated away from the area in multiple directions. Whether *P. aeruginosa* utilizes a form of surface-associated motility along collagen fibrils to disseminate through the cornea is to be determined. This is of interest, considering that twitching motility is a critical virulence factor for *P. aeruginosa* in this corneal infection model [30,31].

### Impact of MyD88 on bacterial traversal

To gain further mechanistic insights into how the corneal epithelium normally defends itself against bacterial traversal, the role of MyD88, a central adaptor protein for TLR signaling, was examined. This was done by comparing wild-type to MyD88 knockout (−/−) mice.

After image acquisition (z-stacks), image stacks were analysed using a custom program which permitted quantitative z-axis profiling of bacterial traversal from any of the three signals that localized the structure of epithelium in addition to bacterial fluorescence (Figure 5A). To take tissue surface irregularities into account (the corneal surface is curved), an image stack (a field) was divided into approximately 1000 sub-volumes for analysis. In each sub-volume, the algorithm located the apical and basal sides of the epithelium. The epithelium was sub-divided into ten bins along the z-axis relative to its local thickness. Background subtraction was performed on the corresponding bacterial fluorescence trace for each sub-volume. The remaining fluorescence intensity of bacteria, which served as a proxy for the number of bacteria, in each z-bin was integrated. The sum of local profiles across all sub-volumes provided the final fluorescence intensity as a function of traversal distance for a particular field.

Figure 5B shows a quantitative comparison of wild-type to MyD88 knockout mice on traversal after tissue paper blotting to allow adherence (no EGTA treatment). The impact of MyD88



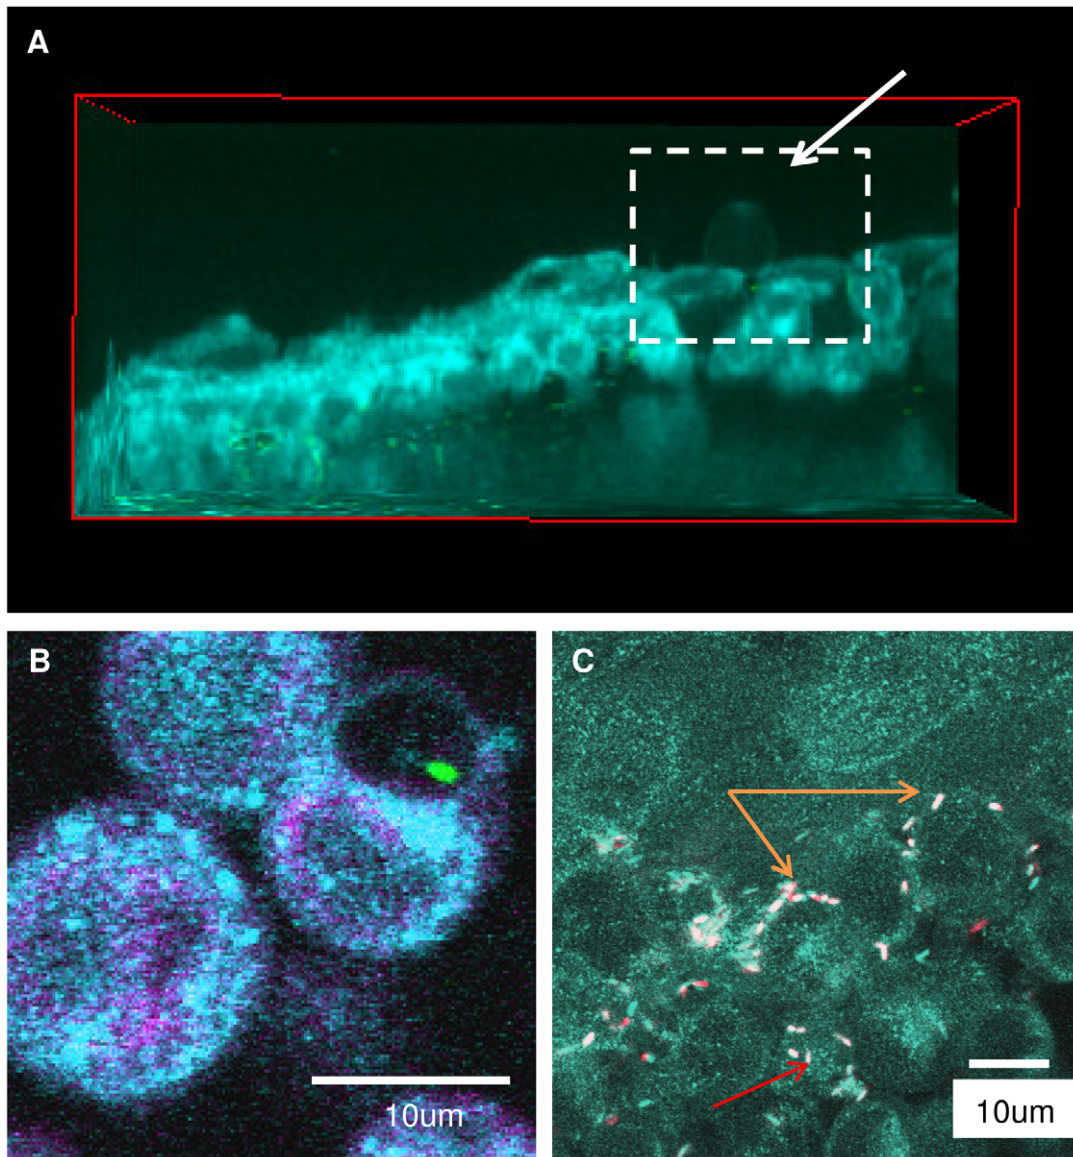

**Figure 3. Temporal and spatial tracking of EGTA-enabled bacterial traversal.** Traversal was enabled in the corneal epithelium of transgenic mice expressing CFP-tagged cell membranes (cyan). Panels (a, b) show bacterial-induced membrane bleb formation *ex vivo* visualized as spherical membrane projections (arrow) extending away from the epithelial cells. A representative view in the xz plane is shown in (a), and a higher magnification imaging revealing a bleb-confined bacterium is shown in (b). In (c), bacteria can be seen located between cells (orange arrows) where some were motile (fast-moving GFP-bacteria, red; slower-moving GFP-bacteria, white = captured twice in both CFP and GFP channels). Other bacteria in this image appeared to be in the cytoplasm (red arrow).  
doi:10.1371/journal.pone.0024008.g003

deficiency was found to be similar to EGTA treatment, i.e. it enabled bacteria to traverse deeply through the blotted, multilayered corneal epithelium with a significant number reaching the basal lamina by 8 h post-inoculation as compared to wild-type controls that showed no significant traversal (Figure 6A and Video S7).

Close inspection of the NAD(P)H AF images suggested that the epithelium of MyD88 knockout murine corneas was altered after the blotting and the subsequent 8 h of bacterial challenge. Many of the epithelial cells were rounded, and the total number of cell layers appeared reduced. While cell rounding was also seen after bacteria had traversed EGTA-treated corneas (Figures 2 and 3), the apparent “thinning” of the entire epithelial layer was observed only for challenged MyD88 knockout eyes. To explore the

mechanism for these morphological changes, experiments were repeated using a shorter challenge time frame (4 h versus 8 h). The data showed unusually large numbers of bacteria adhering to the surface of MyD88 knockout corneas at 4 h, without significant traversal (Figure 6B and Video S8). MyD88 mutation enhanced bacterial adhesion at time points earlier than it enabled traversal. Further, the underlying corneal epithelium appeared morphologically normal at the earlier (4 h) time point. Thus, changes to epithelial morphology noted at 8 h must have occurred *after* bacteria bound, and were probably caused by the bacteria, rather than being a direct result of MyD88 mutation. Indeed, we might expect cells lacking MyD88 (important in innate defense responses) to be more sensitive to negative effects of bacteria than “normal” EGTA exposed cells.

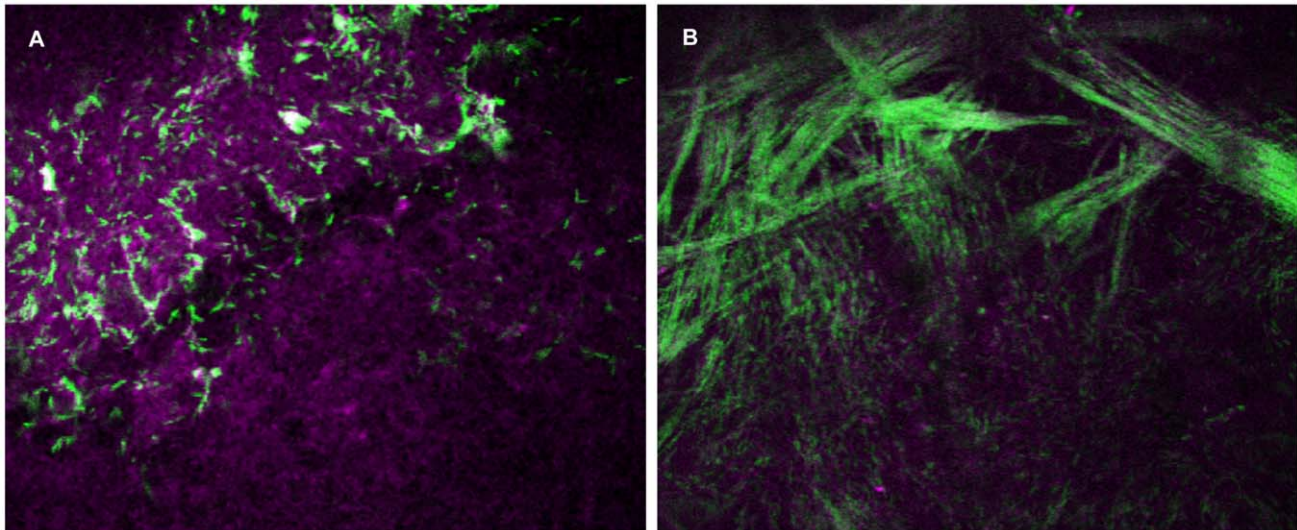

**Figure 4. Imaging of bacteria and cells within opaque infected mouse corneas.** Panel (a) shows NAD(P)H autofluorescence (magenta) of corneal epithelial cells and bacteria (green) detected from optically opaque (infected) mouse eyes 24 h post-scratch and inoculation. In panel (b), bacteria (green) within the stroma of the cornea were found to orient themselves along the pattern of the collagen fibrils. Field size:  $189 \mu\text{m} \times 189 \mu\text{m}$ .

doi:10.1371/journal.pone.0024008.g004

Use of the reflection method in combination with NAD(P)H autofluorescence allowed the impact of 8 h of bacterial challenge on cell viability to be examined (Figure 6C and Video S9). That data showed that the apparent “thinning” of the epithelial cell layer was actually due to loss of metabolic activity of many of the surface cells; i.e. some cells were visible by the reflection method, but not by NAD(P)H AF. While there were some bacteria located at the interface between non-active (visible by reflection) and metabolically active (visible by NAD(P)H autofluorescence), bacteria were also found located between and below metabolically active cells, suggesting that bacterial traversal was not simply a consequence of cell death, despite the noted changes to cell viability.

Since blotted MyD88 knockout corneas showed increased susceptibility to bacterial adhesion and bacterial traversal

compared to wild-type, we next explored its impact in the absence of blotting. Surprisingly, the corneal epithelium of freshly excised MyD88 mutant eyeballs was susceptible to both bacterial adhesion ( $5752 \pm 2601 \text{ cfu/mm}^2$ ) and subsequent bacterial traversal (Figure 7A, 7C) without the need for blotting, or any other form of manipulation. In contrast, bacteria only occasionally adhered to wild-type control mouse corneas ( $672 \pm 319 \text{ cfu/mm}^2$ ) under the same circumstances (Figure 7B, 7C).

A potential mechanism for MyD88 knockout corneal susceptibility to bacterial adhesion and subsequent traversal would be if the lack of MyD88 disrupted epithelial junctional integrity. To explore that possibility, MyD88 knockout and wild-type mice were compared for corneal epithelial susceptibility to fluorescein staining/penetration, a test used widely in epithelial cell culture,

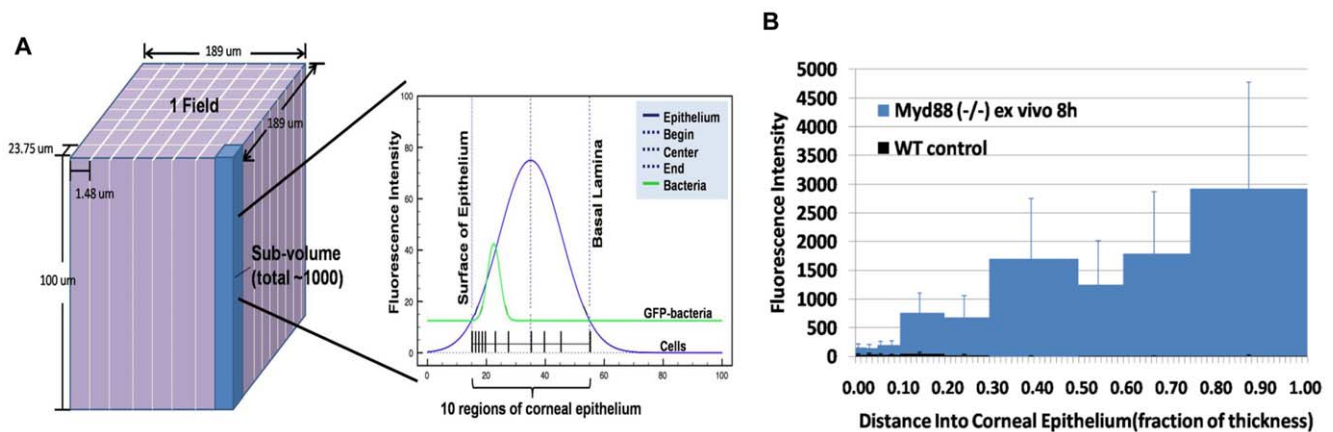

**Figure 5. Quantitative localization of bacteria within *ex vivo* blotted and bacterially challenged MyD88 deficient mouse corneas at 8 h time-point.** Panel (a) shows a schematic of the custom bacterial quantification program. Each image stack is divided into ~1000 sub-volumes; in each sub-volume, the top and bottom of epithelium were localized in which 10 bins along the z-depth were assigned, followed by bacterial fluorescence quantification in each bin, and finally summation of all bins of the same z-depth across the entire image stack. Panel (b) shows quantitative analysis of bacteria traversing to the basal lamina for MyD88 (-/-) but not wild-type mice (0.00 represents the corneal surface, 1.00 the basal lamina). Average  $\pm$  S.E. of three fields are shown.

doi:10.1371/journal.pone.0024008.g005



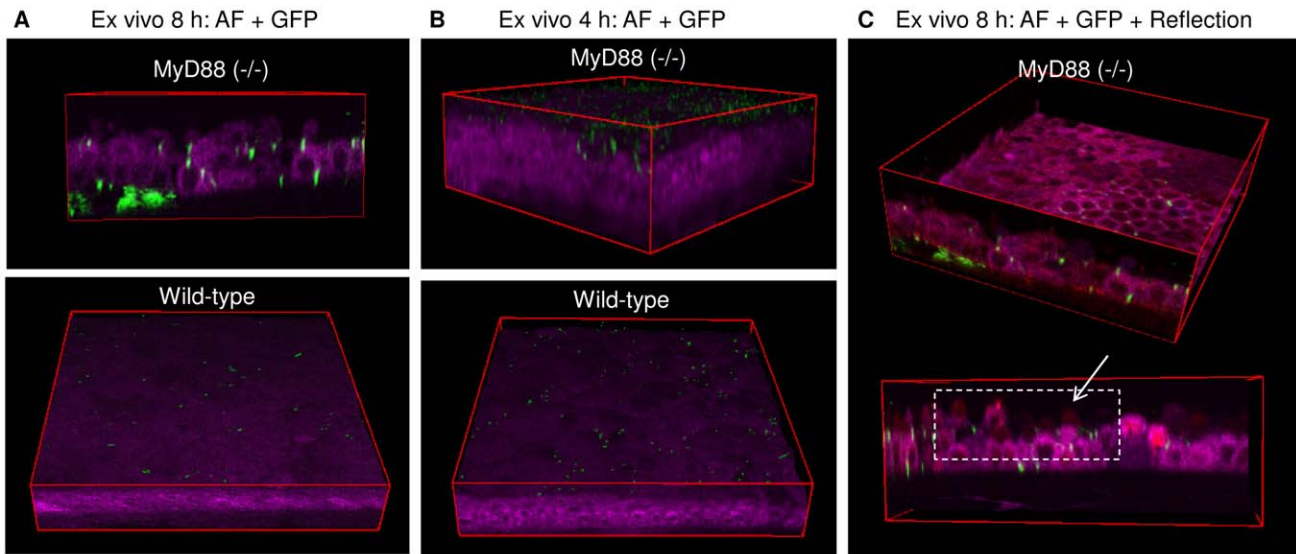

**Figure 6. Impact of MyD88 deficiency on defense against epithelial traversal by bacteria after blotting.** Panel (a) shows two-photon images of cellular NAD(P)H autofluorescence (magenta) of MyD88 (-/-) (top) and wild-type (bottom) mouse corneas. Deep bacterial traversal (GFP, green) of corneal epithelium was detected in MyD88 (-/-) but not wild-type mice 8 h after bacterial challenge *ex vivo*. Only adherent bacteria without epithelial traversal were found in tissue paper-blotted wild-type corneas. Panel (b) shows an earlier (4 h) time-point at which a relatively larger number of bacteria were found adhering to the MyD88 (-/-) corneal epithelium as compared to the wild-type. In panel (c), merged image (fuchsia) of reflection (red) and autofluorescence (magenta) is shown. Reflection confocal methodology (red) can be used to capture cells not visualized by autofluorescence (i.e. dying or dead cells) to monitor cell viability during bacterial traversal. This method confirmed that penetrated bacteria at the later (8 h) time point were overlaid with epithelial cells. doi:10.1371/journal.pone.0024008.g006

whole tissues, and in the eyes of human patients in routine clinical practice, to assess epithelial permeability/junctional integrity [32–34]. Confocal microscopy was used to determine depth of fluorescein penetration. Even without subsequent EGTA treatment, the epithelium of blotted wild-type mouse corneas was susceptible to deep penetration by fluorescein (Fig. 8). In contrast, neither wild-type nor MyD88 knockout corneas labeled with fluorescein when not blotted (Fig. 8). Therefore, susceptibility of unblotted MyD88 knockout corneas to bacterial adherence and traversal was not due to disruption of epithelial tight junctions prior to bacterial exposure. Further, the data suggest that tight junctions do not act in isolation to modulate bacterial traversal in

wild-type eyes. Whatever the case, these two models enable traversal by different mechanisms, which will provide additional tools for subsequent studies of epithelial defense against infection.

Since bacteria bound to (and penetrated) unblotted MyD88 deficient corneas, MyD88 is required for defending the healthy corneal epithelial surface against bacterial adhesion, in addition to protecting it against bacterial traversal. How these findings reconcile with the established role of surface-associated mucins in protecting against bacterial adhesion is not yet clear.

The above studies were done using freshly excised eyeballs. We have reported that tear fluid, which bathes the corneal epithelium *in vivo*, is protective against bacteria [35,36]. In a more recent *in*

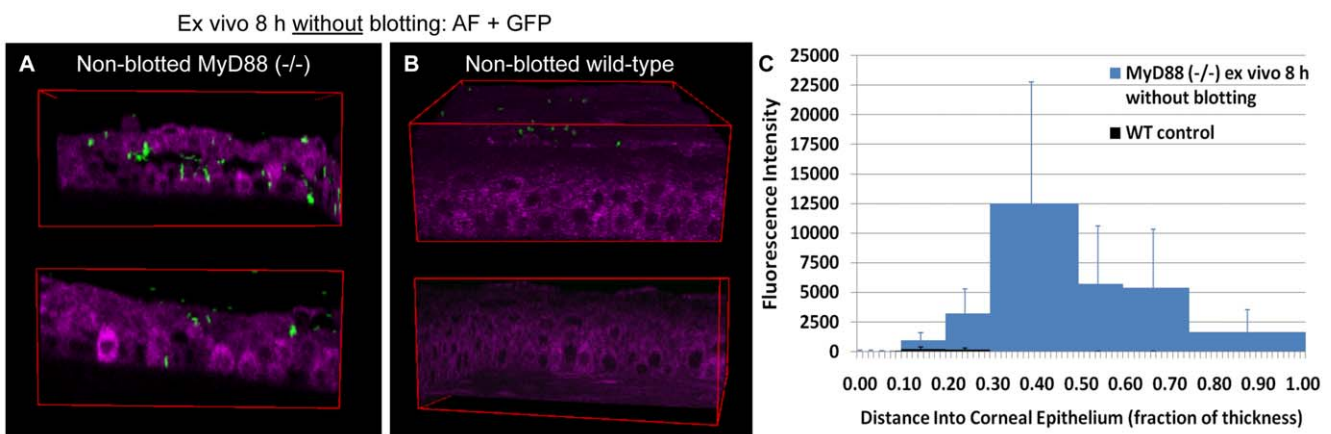

**Figure 7. Impact of MyD88 deficiency in the absence of blotting.** Panels (a) and (b) show two-photon images of cellular NAD(P)H autofluorescence (magenta) in non-blotted MyD88 (-/-) or wild-type mouse corneal epithelium 8 h after bacterial challenge *ex vivo*. Significant bacterial adherence and traversal (GFP, green) were found in MyD88 (-/-) mouse (a) but not wild-type mouse corneas (b). This observation was confirmed by quantitative localization of GFP bacteria using the custom program as shown in panel (c). doi:10.1371/journal.pone.0024008.g007

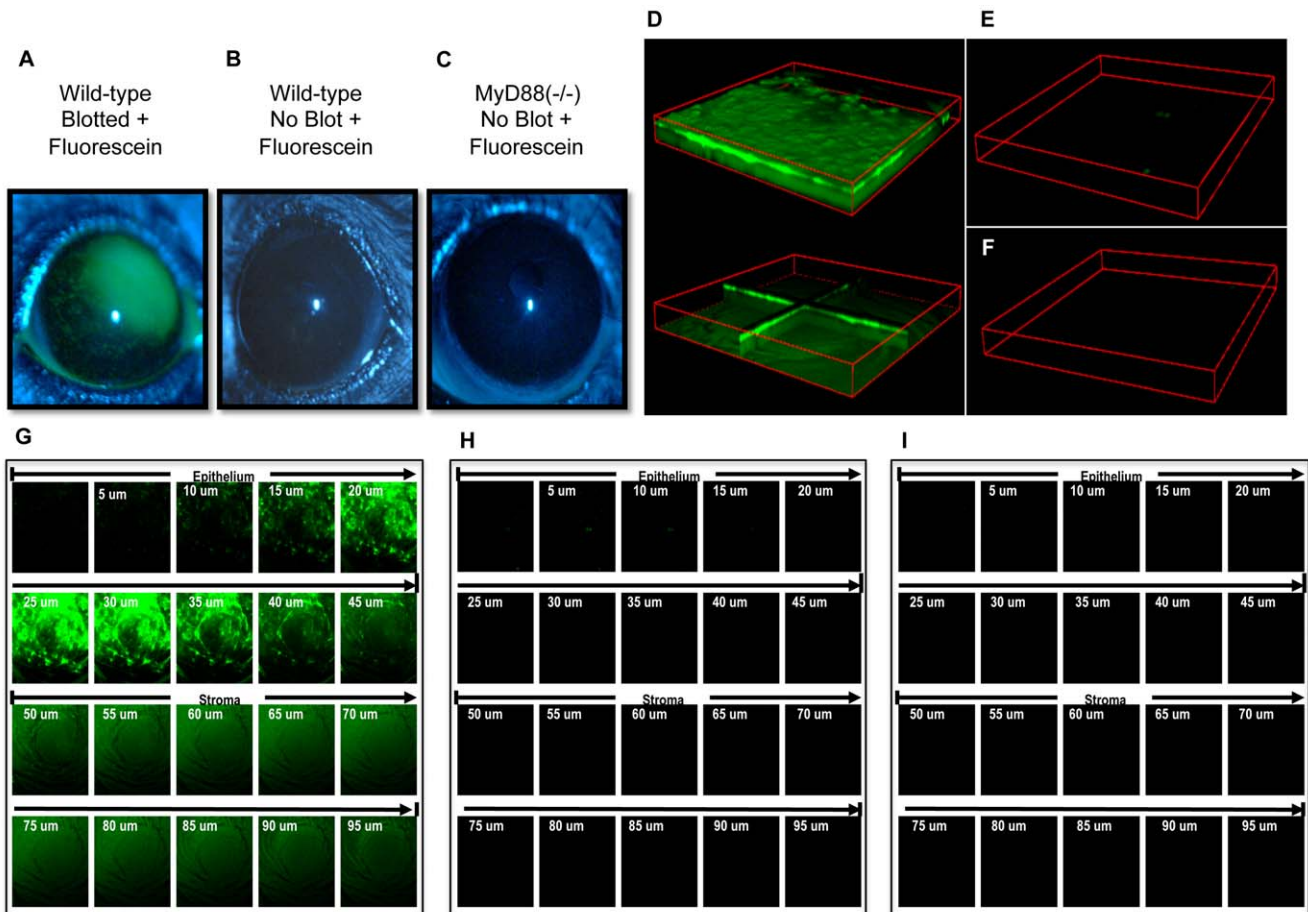

**Figure 8. MyD88 corneas do not label with fluorescein suggesting tight junctions are intact *ex vivo* and *in vivo*.** Fluorescein was added to tissue paper blotted or normal healthy (non-blotted) mouse corneas to access cell-cell junction integrity. Extent of corneal staining was examined using a slit lamp (a–c) and confocal microscopy (d–i). Panels (a, d, g) show extensive fluorescein staining (green) in blotted wild-type (C57BL/6) corneas, but not non-blotted wild-type (b, e, h) or MyD88 (–/–) (c, f, i) mouse corneas. Z-stack confocal images (1272  $\mu\text{m} \times 1272 \mu\text{m} \times 100 \mu\text{m}$ ) are presented as 3D block view (d, top), 3D orthoslice view (d, bottom), and 2D x–y view (g) for blotted and fluorescein stained wild-type mouse cornea. In parallel, 3D block views and 2D x–y views of confocal images are shown for normal wild-type (e, h) and MyD88 (–/–) (f, i) mouse corneas. These data show that epithelial tight junctions are intact in MyD88 knockout corneas prior to bacterial exposure.  
doi:10.1371/journal.pone.0024008.g008

*in vivo* study we showed that tear fluid can modulate epithelial immunity directly to protect cells against various bacterial virulence strategies, involving upregulation of both RNase7 and ST2 [37]. Thus, we performed experiments in which the blotting and bacterial challenge steps were both performed while the eye was *in vivo*. Experiments were done both with and without blotting using 8 h of bacterial challenge, and both wild-type (control) and MyD88 knockout mice. With blotting, the *in vivo* results mirrored the *ex vivo* results, i.e. both wild-type and MyD88 knockout mouse corneas bound bacteria, with more extensive binding and also epithelial traversal by bacteria for the MyD88 mutant eyes (Figure 9A–C). As expected, bacteria did not associate at all with non-blotted wild-type corneas *in vivo* (Figure 9E, 9F). MyD88-deficient corneas showed only low level bacterial adhesion and only shallow bacterial penetration beyond the surface (Figure 9D, 9F). This contrasted with results obtained for experiments done *ex vivo* that yielded significant adhesion and penetration to the basal lamina. Indeed, *ex vivo* data showed maximal GFP fluorescence intensity was 12,000 at a depth of 0.4 towards the basal lamina (Figure 7); *in vivo* it peaked at only 1,200 and at a more shallow level of 0.2 (Figure 9F). Thus, the unmanipulated MyD88-deficient

corneas were less susceptible to bacterial colonization *in vivo*, than they were when removed and challenged *in vitro*. Whether this is explained by (MyD88-independent) protective biochemical factors *in vivo*, or simply by physical removal of bacteria during blinking/tear flow, is yet to be established.

#### Blotting/EGTA pretreatment versus MyD88 knockout mice as models for enabling traversal to be studied

While useful for studying defenses against traversal, these models also provide systems that could be used to enable the traversal process to be studied (e.g. identifying bacterial factors involved). The two approaches have different advantages; i.e. blotting/EGTA treatment can be used with mice of any background (i.e. wild-type, gene knockouts, or transgenic mice such as the CFP membrane mice), while use of MyD88 knockouts does not necessitate chemical or other treatment of the tissue to enable traversal.

Given the known functions of MyD88, its role in defense against both bacterial adhesion and bacterial traversal are likely to involve either TLR- or IL-1-mediated epithelial-, or resident macrophage or dendritic cell-, derived/initiated innate defenses. These could



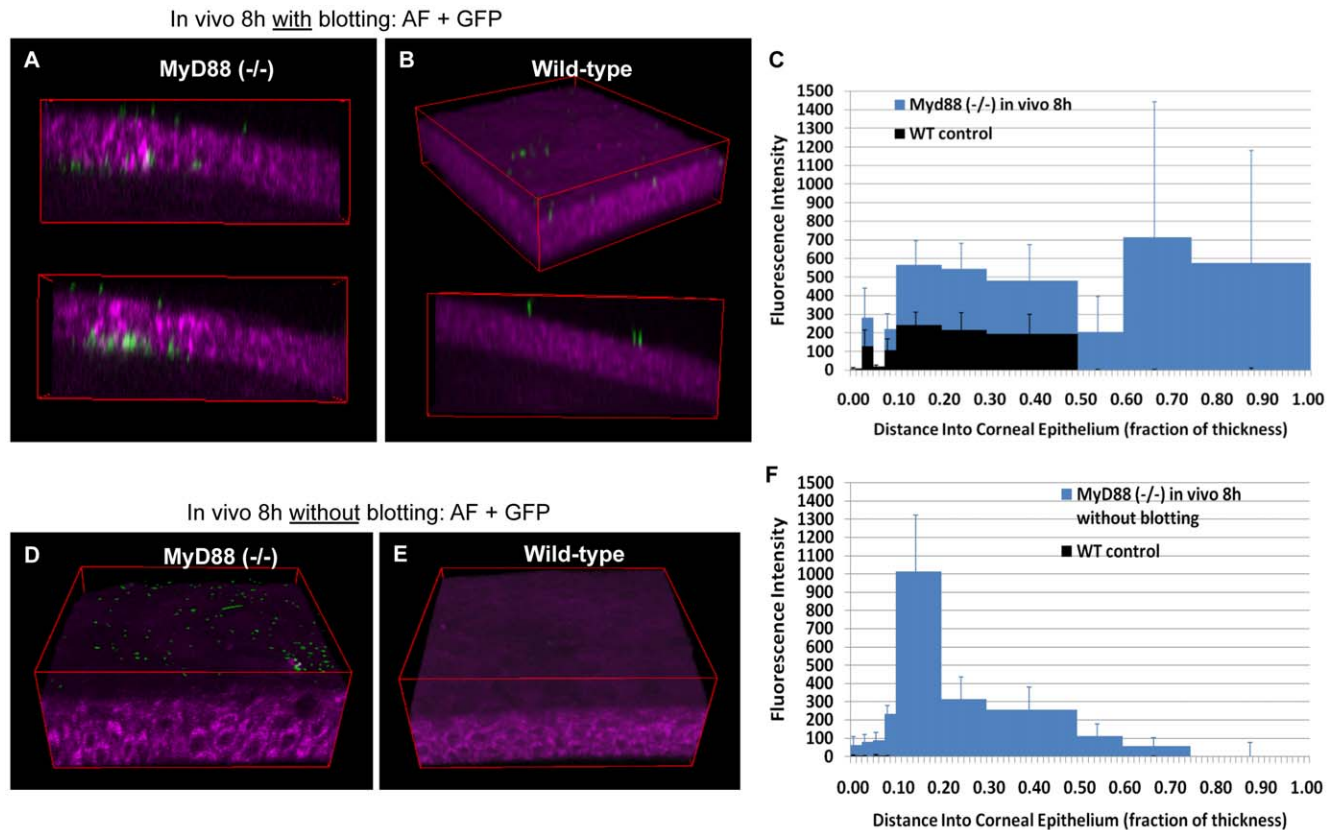

**Figure 9. Impact of MyD88 deficiency on colonization *in vivo*.** Similar to the *ex vivo* results at the same time-point, panels (a) and (b) show blotted corneas of MyD88 (-/-) mice were more susceptible to both bacterial adherence and traversal after 8 h of bacterial challenge as compared to blotted wild-type which showed bacterial adherence only. This observation was confirmed by quantitative localization of GFP bacteria using the custom program as shown in panel (c). Whereas in the absence of blotting, panels (d) and (e) show bacterial traversal *in vivo* was disabled. Only bacteria adherence was detected on MyD88 (-/-) (d) but not wild-type (e) mouse corneas. This observation was confirmed by quantitative localization of GFP bacteria using the custom program as shown in panel (f). doi:10.1371/journal.pone.0024008.g009

include antimicrobial peptides, or infiltrating phagocytes (*in vivo*) [38–43]. Junctional integrity has also been shown to be responsive to TLR-, and MyD88-, mediated signaling in intestinal epithelia [44]. While the data in Fig. 9 show normal barrier function in naïve MyD88 knockout mice (and therefore that tight junctions are functionally intact), it remains possible that regulation of junctional integrity in the face of bacterial challenge is compromised in the corneas of MyD88 knockout animals. Other possibilities are that mucins (or other epithelial surface-associated moieties that either bind or repel bacteria) are dependent on MyD88, or that they act in synergy with MyD88-mediated factors (such as antimicrobials) to exert their protective effects. Further research will be needed to sort through these and other potential possibilities for MyD88 involvement in epithelial defense against traversal by microbes.

## Conclusion

In this report, we demonstrate that the combination of various imaging methods can be used to further our understanding of bacterial-host cell interactions in live unprocessed tissues. These relatively simple and robust non-invasive methods, used with strategies for manipulating tissue susceptibility to microbes, and a custom data analysis program, represent a set of novel, quantitative tools for studying both pathogenesis of, and defenses against, infection. Using them, we have shown directly that MyD88 plays a critical role in defense against epithelial

colonization by a Gram-negative opportunistic pathogen, and demonstrating that host-pathogen interactions reported to occur *in vitro* (e.g. membrane bleb-niche formation) can also occur when tissues are challenged intravitally. The data presented also suggest new insights into bacterial pathogenesis not previously reported (such as a spatio-temporal relationship between bacteria and collagen fibrils during infection), that can now be expanded upon using the developed methods. While there are clear advantages to using mice, including the availability of gene knockouts and other reagents, these methods could be used with eyes from other species or with other types of tissue. With the correct combination of resources, and if image stabilization can be achieved at the high magnification needed to detect infecting bacteria, these methods could be implemented *in vivo* using anesthetized live animals as has been done for studying immune cell trafficking [45]. Since these imaging methods are non-invasive, there could even be potential for translation to use in humans.

## Materials and Methods

### Ethics Statement

All procedures involving animals were performed in strict accordance with a protocol approved by the Animal Care and Use Committee, University of California, Berkeley, which is an AAALAC accredited institution. Protocol #R203-1210B.

## Source of Mice

MyD88 (−/−) mice fully backcrossed to a C57BL/6 background were provided by Dr. Greg Barton (University of California, Berkeley, CA). C57BL/6 transgenic mice expressing membrane-bound CFP under the control of human ubiquitin C promoter were also used in some experiments [46]. Age-matched C57BL/6 and Black Swiss wild-type mice were purchased from Taconic Farm Inc. (Hudson, NY).

## Bacterial strain and inoculum preparation

*Pseudomonas aeruginosa* invasive strain PAO1 expressing enhanced GFP (PAO1-GFP) from a highly stable, multicopy plasmid (pSMC2) was used [47] (kindly provided by Dr. Gerald B. Pier, Harvard Medical School). Plasmid transformation of bacteria was achieved by standard electroporation. Bacteria were grown on tryptic soy agar plates supplemented with carbenicillin 300 µg/ml at 37°C for ~16 h. Inocula were prepared by suspending bacteria in Dulbecco's Modified Eagle's Medium (Lonza, Walkersville, MD) to a concentration of ~10<sup>8</sup> or 10<sup>11</sup> cfu/ml. We have previously confirmed that the bacteria can retain this, and other, plasmids *in vivo* even without antibiotic selection (up to 48 h and longer) [48,49], and show strong fluorescence using conventional and confocal fluorescence microscopy.

## Ex vivo traversal model

C57BL/6 wild-type and MyD88 (−/−) gene knockout mice were subject to lethal injection with anesthesia cocktail (21 mg/ml ketamine, 2.4 mg/ml xylazine, and 0.3 mg/ml acepromazine). Whole eyes were enucleated to exclude tear fluid before a PBS rinse (~10 ml), tissue paper blotting (when used) with Kimwipe™ (Kimberly-Clark) and incubation with 200 µL of bacterial suspension (~10<sup>11</sup> cfu/ml) at 35°C for 4 or 8 h before imaging. In some experiments, blotted eyeballs from transgenic CFP-membrane mice and Black Swiss wild-type mice were treated with EGTA (100 mM in PBS) or PBS alone for 1 h before bacterial incubation for 6 h (both treatments at 35°C).

## In vivo traversal model

C57BL/6 wild-type and MyD88 (−/−) gene knockout mice were subject to anesthesia by intraperitoneal injection (50 µl/25 g of body weight) of ketamine/xylazine/acepromazine cocktail. One cornea of each of the anesthetized mice were rinsed with PBS to wash away tear fluid, then blotted with Kimwipe™ tissue paper (when used) and inoculated with 5 µl of bacterial suspension (~10<sup>11</sup> cfu/ml). Animals were euthanized 8 h post-inoculation by lethal injection, and eyes were carefully enucleated, then rinsed with PBS (~10 ml) prior to imaging.

## Scratch infection model

One cornea of anesthetized mice was scratched linearly three times using a sterile 25-gauge needle, then inoculated with 5 µl of bacterial suspension (~10<sup>8</sup> cfu/ml). Animals were euthanized 24 h post-inoculation when corneal opacity had become obvious. Eyes were carefully enucleated and rinsed with PBS prior to imaging.

## Technologies for visualization of bacteria and host cells

GFP-expressing bacteria were excited by the 488 nm argon ion laser line (different fluorophores, e.g. RFP, can be used for bacteria as needed) or the multiphoton laser at 920 nm (in opaque mouse corneas). To visualize corneal epithelial cells in live unprocessed eyeballs, a combination of previously described two-photon and confocal imaging techniques were used [50,51]: (1) Multiphoton

excitation at 720 nm from the Ti:Sa laser with a pulse width of ~100 fs and maximum average power of ~1.6 W into the microscope, which excites endogenous NAD(P)H molecules in metabolically active living cells [17–19]. Corneas were previously used to show the potential of *in situ* NAD(P)H autofluorescence (AF) via two-photon microscopy for assessing cellular metabolic states [17]. (2) HeNe laser line at 633 nm, which allows imaging of both live and dead cells by detecting reflected light [51]. (3) Argon ion laser line at 458 nm, which excites membrane-bound CFP expressed in transgenic mice.

## Combined two-photon/confocal imaging of whole eyeballs

Mouse eyeballs examined for bacterial traversal were rinsed with PBS three times to remove non-adherent bacteria. After rinsing, the back of an eyeball (where the optic nerve is located) was fixed on a 12 mm round glass coverslip with cyanoacrylate glue to maintain an upright position (i.e. cornea facing up). The coverslip/eyeball was placed in a 47 mm Petri dish which was then filled with Ham's F-12 medium (Lonza, Walkersville, MD) to cover the eyeball completely, and was ready for imaging using a 63x/0.95 NA water-dipping objective of an upright two-photon/confocal microscope (LSM 510 META NLO Axio Imager; Carl Zeiss, Thornwood, NY) equipped with a tunable, ultrafast and dispersion-compensated Ti:Sapphire laser (Mai Tai DeepSee; Spectra-Physics, Santa Clara, CA). A 435–485 nm bandpass or a 500–550 nm bandpass filter was used to detect NAD(P)H AF or GFP respectively. Three or more random fields of each eye were imaged from the corneal surface through the entire epithelium in 0.5 µm steps. Three dimensional images were reconstructed from z-stacks using ImageJ (NIH).

## Computer program for quantitative localization of bacteria

Data analysis was performed with IDL (ITT Corp., Boulder, CO; code available upon request). The epithelium was divided by binning adjacent x-y pixels into typically 1.48 µm x 23.75 µm. Sub-division of the image stack and analysis of the fluorescence profiles as a function of z to locate the apical and basal sides of the epithelium was found to be superior to Sobel and Roberts edge enhancement filters which did not give satisfactory results.

For each sub-volume, we had two relevant channels: one containing the structural information regarding the epithelia (AF, reflection, or CFP), and the other containing bacterial fluorescence (e.g. GFP). AF and CFP give a similar profile, characterized by a single central peak in fluorescence as a function of z, while reflection requires a slightly different strategy to locate the apical/basal surfaces. After sub-division, the AF or CFP data stack was optionally smoothed, depending on the signal-to-noise ratio, using a boxcar average. The central peak was then located using a peak-finding algorithm which computes the derivative of the fluorescence trace by convolution with a Savitsky-Golay filter. The order and number of points of the filter were selected by the user. The peak was located by searching for zero crossings in the derivative. Once located, this point marked the center of the epithelium. At this point, the apical and basal edges of the epithelium were located by using the same peak-finding algorithm to locate the peak values of the derivative of the AF or CFP profile from the beginning of the stack to the center of the epithelium (apical) and from the center of the epithelium to the end of the stack (basal).

When using reflection to locate the surfaces the situation is slightly different. Reflection profiles have two strong peaks: one at the surface of the cornea and one at the basal lamina. Hence, the

peak finding algorithm was used to locate these two peaks. The edges of the epithelium were located by peak-searching the derivative of the reflection signal from the beginning of the stack to the surface peak (apical) and from the basal lamina peak to the end of the stack (basal).

To quantify bacterial traversal in each sub-volume, a threshold was used first to determine if bacteria were present. This threshold is set by the user and must be adjusted depending on the particular image stack. If there was significant bacterial fluorescence, the corneal thickness was binned into ten z-bins and the fluorescence is integrated over each bin. This gave a local profile of the bacterial traversal of the epithelium. The sum of the individual profiles gave an overall representation of the traversal in the image stack.

## Supporting Information

**Video S1** CFP-membrane mouse corneas were tissue paper blotted, PBS treated for 1 h, then bacteria- challenged for 6 h *ex vivo* before confocal imaging. Moving XZ and XY planes of the 3D image show individual corneal epithelial cells (CFP membrane, magenta) with GFP bacteria (green) adhering on the epithelial surface. (MOV)

**Video S2** Confocal imaging of *ex vivo* blotted, EGTA treated (1 h) and bacteria-challenged (6 h) CFP-membrane mouse corneas. Moving XZ and XY planes of the 3D image show corneal epithelial cells (CFP membrane, magenta) with GFP bacteria (green) deeply traversing the corneal epithelium to the level of the underlying basal lamina. (MOV)

**Video S3** Two-photon and confocal imaging of *ex vivo* blotted, EGTA treated (1 h) and bacteria- challenged (6 h) wild-type Black Swiss mouse corneas. Moving XZ, YZ and XY planes of the 3D image show corneal epithelial cells (cytoplasmic autofluorescence, magenta) with GFP bacteria (green) deeply traversing the corneal epithelium to the level of the underlying basal lamina. (MOV)

**Video S4** 3D block view of the confocal image of *ex vivo* blotted, PBS treated (1 h) and bacteria- challenged (6 h) CFP membrane mouse corneas. GFP bacteria (green) were found to adhere to the corneal surface without traversing the epithelium. CFP cell membranes are shown in red. (MOV)

**Video S5** Combined two-photon and confocal time-lapse imaging of GFP bacteria (green) confined in a CFP membrane bleb (cyan) of the corneal epithelium (cytoplasmic autofluorescence, magenta) of transgenic CFP-membrane mouse corneas blotted, EGTA treated (1 h) and bacteria-challenged (6 h) *ex vivo*. (MOV)

## References

- Kohler H, Sakaguchi T, Hurley BP, Kase BA, Reinecker HC, et al. (2007) *Salmonella enterica* serovar Typhimurium regulates intercellular junction proteins and facilitates transepithelial neutrophil and bacterial passage. *Am J Physiol Gastrointest Liver Physiol* 293: G178–187.
- Macutkiewicz C, Carlson G, Clark E, Dobrindt U, Roberts I, et al. (2008) Characterisation of *Escherichia coli* strains involved in transcytosis across gut epithelial cells exposed to metabolic and inflammatory stress. *Microbes Infect* 10: 424–431.
- Soong G, Parker D, Magargee M, Prince AS (2008) The type III toxins of *Pseudomonas aeruginosa* disrupt epithelial barrier function. *J Bacteriol* 190: 2814–2821.
- Zaslhoff M (2007) Antimicrobial peptides, innate immunity, and the normally sterile urinary tract. *J Am Soc Nephrol* 18: 2810–2816.
- McDermott AM (2009) The role of antimicrobial peptides at the ocular surface. *Ophthalmic Res* 41: 60–75.
- Fleiszig SM, Zaidi TS, Ramphal R, Pier GB (1994) Modulation of *Pseudomonas aeruginosa* adherence to the corneal surface by mucus. *Infect Immun* 62: 1799–1804.
- Ramphal R, McNiece MT, Polack FM (1981) Adherence of *Pseudomonas aeruginosa* to the injured cornea: a step in the pathogenesis of corneal infections. *Ann Ophthalmol* 13: 421–425.
- Meza I, Ibarra G, Sabanero M, Martinez-Palomo A, Cerejido M (1980) Occluding junctions and cytoskeletal components in a cultured transporting epithelium. *J Cell Biol* 87: 746–754.
- Boudsocq M, Willmann MR, McCormack M, Lee H, Shan L, et al. (2010) Differential innate immune signalling via Ca(2+) sensor protein kinases. *Nature* 464: 418–422.
- Gripar SC, Richardson WM, Sodhi CP, Hackam DJ (2008) No longer an innocent bystander: epithelial toll-like receptor signaling in the development of mucosal inflammation. *Mol Med* 14: 645–659.

**Video S6** Two-photon imaging of cellular autofluorescence (magenta) and GFP bacteria (green) within an opaque infected wild-type mouse cornea. Bacteria are visible in both the epithelium and in the stroma, but the colonized areas are spatially separated by the intervening basal lamina. Those in the epithelium form a circular pattern around cells/cell nuclei, while those in the stroma are seen lined up (single file) along the collagen fibrils. (MOV)

**Video S7** *Ex vivo* blotted and bacteria-challenged MyD88 (−/−) mouse corneas at 8 h time-point. 3D image of the cornea showed GFP bacteria (green) traversed the entire thickness of the corneal epithelium (cytoplasmic autofluorescence, magenta). Traversal was accompanied by disruption of epithelial morphology, but bacteria did not cross the underlying intact basal lamina into the stroma. (MOV)

**Video S8** *Ex vivo* blotted and bacterially challenged MyD88 (−/−) mouse corneas at 4 h time-point. Traversal was not enabled at this shorter time-point, and the epithelium demonstrated normal morphology. However, the MyD88 (−/−) mouse corneas were found significantly more susceptible to bacterial adherence than wild-type at this early time-point. (MOV)

**Video S9** The reflection method was used to enable visualization of both live and dead cells (red), while the autofluorescence method showed only live cells (detects cytoplasmic NAD(P)H of actively metabolizing cells) (magenta). The two channels were superimposed (fuchsia) to confirm that penetrated bacteria (green) in tissue-paper blotted MyD88 (−/−) mouse corneas were actually overlaid with cells, and that some overlying cells remained viable. Note the large number of bacteria at the interface between the epithelium and the stroma (appears red) at the level of the basal lamina barrier. (MOV)

## Acknowledgments

We thank Dr. Greg Barton (University of California, Berkeley) for C57BL/6 MyD88 (−/−) mice; Dr Gerald B. Pier (Harvard Medical School) for *P. aeruginosa* strain PAO1-GFP; H. Aaron (Molecular Imaging Center, UC Berkeley); and the Center for Host-Pathogen Studies, UC Berkeley for microscopy instrumentation and advice.

## Author Contributions

Conceived and designed the experiments: CT DJE EAR SMJF. Performed the experiments: CT JL JJM PH. Analyzed the data: CT JL EAR DJE SMJF. Wrote the paper: CT JL EAR DJE SMJF. Developed the traversal quantification method: JL CT.



11. Wells JM, Rossi O, Meijerink M, van Baarlen P (2011) Microbes and Health Sackler Colloquium: Epithelial crosstalk at the microbiota-mucosal interface. *Proc Natl Acad Sci U S A* 108(Suppl 1): 4607–4614.
12. Abreu MT (2010) Toll-like receptor signalling in the intestinal epithelium: how bacterial recognition shapes intestinal function. *Nat Rev Immunol* 10: 131–144.
13. Bernard JJ, Gallo RL (2010) Cyclooxygenase-2 Enhances Antimicrobial Peptide Expression and Killing of *Staphylococcus aureus*. *J Immunol* 185: 6535–6544.
14. Lee HY, Takeshita T, Shimada J, Akopyan A, Woo JI, et al. (2008) Induction of beta defensin 2 by NTHi requires TLR2 mediated MyD88 and IRAK-TRAF6-p38MAPK signaling pathway in human middle ear epithelial cells. *BMC Infect Dis* 8: 87.
15. Janssens S, Beyaert R (2002) A universal role for MyD88 in TLR/IL-1R-mediated signaling. *Trends Biochem Sci* 27: 474–482.
16. Alarcon I, Tam C, Mun JJ, LeDue J, Evans DJ, et al. (2011) Factors Impacting Corneal Epithelial Barrier Function Against *Pseudomonas aeruginosa* Traversal. *Invest Ophthalmol Vis Sci* 52: 1368–1377.
17. Piston DW, Masters BR, Webb WW (1995) Three-dimensionally resolved NAD(P)H cellular metabolic redox imaging of the in situ cornea with two-photon excitation laser scanning microscopy. *J Microsc* 178: 20–27.
18. Huang S, Heikal AA, Webb WW (2002) Two-photon fluorescence spectroscopy and microscopy of NAD(P)H and flavoprotein. *Biophys J* 82: 2811–2825.
19. Piston DW, Knobel SM (1999) Quantitative imaging of metabolism by two-photon excitation microscopy. *Methods Enzymol* 307: 351–368.
20. Alarcon I, Kwan L, Yu C, Evans DJ, Fleiszig SM (2009) Role of the corneal epithelial basement membrane in ocular defense against *Pseudomonas aeruginosa*. *Infect Immun* 77: 3264–3271.
21. Hood RD, Singh P, Hsu F, Guvener T, Carl MA, et al. (2010) A type VI secretion system of *Pseudomonas aeruginosa* targets a toxin to bacteria. *Cell Host Microbe* 7: 25–37.
22. Fleiszig SM, Evans DJ, Do N, Vallas V, Shin S, et al. (1997) Epithelial cell polarity affects susceptibility to *Pseudomonas aeruginosa* invasion and cytotoxicity. *Infect Immun* 65: 2861–2867.
23. Angus AA, Lee AA, Augustin DK, Lee EJ, Evans DJ, et al. (2008) *Pseudomonas aeruginosa* induces membrane blebs in epithelial cells, which are utilized as a niche for intracellular replication and motility. *Infect Immun* 76: 1992–2001.
24. Angus AA, Evans DJ, Barbieri JT, Fleiszig SM (2010) The ADP-ribosylation domain of *Pseudomonas aeruginosa* ExoS is required for membrane bleb niche formation and bacterial survival within epithelial cells. *Infect Immun* 78: 4500–4510.
25. Steuhl KP, Doring G, Henni A, Thiel HJ, Botzenhart K (1987) Relevance of host-derived and bacterial factors in *Pseudomonas aeruginosa* corneal infections. *Invest Ophthalmol Vis Sci* 28: 1559–1568.
26. Van Horn DL, Davis SD, Hyndiuk RA, Alprent TV (1978) Pathogenesis of experimental *Pseudomonas* keratitis in the guinea pig: bacteriologic, clinical, and microscopic observations. *Invest Ophthalmol Vis Sci* 17: 1076–1086.
27. Mondino BJ, Rabin BS, Kessler E, Gallo J, Brown SI (1977) Corneal rings with gram-negative bacteria. *Arch Ophthalmol* 95: 2222–2225.
28. Gerke JR, Magliocco MV (1971) Experimental *Pseudomonas aeruginosa* Infection of the Mouse Cornea. *Infect Immun* 3: 209–216.
29. Preston MJ, Fleiszig SM, Zaidi TS, Goldberg JB, Shortridge VD, et al. (1995) Rapid and sensitive method for evaluating *Pseudomonas aeruginosa* virulence factors during corneal infections in mice. *Infect Immun* 63: 3497–3501.
30. Zolfaghar I, Evans DJ, Fleiszig SM (2003) Twitching motility contributes to the role of pili in corneal infection caused by *Pseudomonas aeruginosa*. *Infect Immun* 71: 5389–5393.
31. Alarcon I, Evans DJ, Fleiszig SM (2009) The role of twitching motility in *Pseudomonas aeruginosa* exit from and translocation of corneal epithelial cells. *Invest Ophthalmol Vis Sci* 50: 2237–2244.
32. Milatz S, Krug SM, Rosenthal R, Gunzel D, Muller D, et al. (2010) Claudin-3 acts as a sealing component of the tight junction for ions of either charge and uncharged solutes. *Biochim Biophys Acta* 1798: 2048–2057.
33. Rojanasakul Y, Wang IY, Bhat M, Glover DD, Malanga CJ, et al. (1992) The transport barrier of epithelia: a comparative study on membrane permeability and charge selectivity in the rabbit. *Pharm Res* 9: 1029–1034.
34. Kim J (2000) The use of vital dyes in corneal disease. *Curr Opin Ophthalmol* 11: 241–247.
35. Fleiszig SM, Kwong MS, Evans DJ (2003) Modification of *Pseudomonas aeruginosa* interactions with corneal epithelial cells by human tear fluid. *Infect Immun* 71: 3866–3874.
36. Kwong MS, Evans DJ, Ni M, Cowell BA, Fleiszig SM (2007) Human tear fluid protects against *Pseudomonas aeruginosa* keratitis in a murine experimental model. *Infect Immun* 75: 2325–2332.
37. Mun J, Tam C, Evans D, Fleiszig S (2011) Modulation of Epithelial Immunity by Mucosal Fluid. *Scientific Reports* 1. doi:10.1038/srep00008.
38. Sun Y, Karmakar M, Roy S, Ramadan RT, Williams SR, et al. (2010) TLR4 and TLR5 on corneal macrophages regulate *Pseudomonas aeruginosa* keratitis by signaling through MyD88-dependent and -independent pathways. *J Immunol* 185: 4272–4283.
39. Huang X, Du W, McClellan SA, Barrett RP, Hazlett LD (2006) TLR4 is required for host resistance in *Pseudomonas aeruginosa* keratitis. *Invest Ophthalmol Vis Sci* 47: 4910–4916.
40. Huang X, Barrett RP, McClellan SA, Hazlett LD (2005) Silencing Toll-like receptor-9 in *Pseudomonas aeruginosa* keratitis. *Invest Ophthalmol Vis Sci* 46: 4209–4216.
41. Wu M, McClellan SA, Barrett RP, Zhang Y, Hazlett LD (2009) Beta-defensins 2 and 3 together promote resistance to *Pseudomonas aeruginosa* keratitis. *J Immunol* 183: 8054–8060.
42. Redfern RL, Reins RY, McDermott AM (2011) Toll-like receptor activation modulates antimicrobial peptide expression by ocular surface cells. *Exp Eye Res* 92: 209–220.
43. Augustin DK, Heimer SR, Tam C, Li WY, Le Due JM, et al. (2011) Role of defensins in corneal epithelial barrier function against *Pseudomonas aeruginosa* traversal. *Infect Immun* 79: 595–605.
44. Cario E, Gerken G, Podolsky DK (2007) Toll-like receptor 2 controls mucosal inflammation by regulating epithelial barrier function. *Gastroenterology* 132: 1359–1374.
45. Speier S, Nyqvist D, Kohler M, Caicedo A, Leibiger IB, et al. (2008) Noninvasive high-resolution in vivo imaging of cell biology in the anterior chamber of the mouse eye. *Nat Protoc* 3: 1278–1286.
46. Melichar HJ, Li O, Herzmark P, Padmanabhan RK, Oliaro J, et al. (2010) Quantifying subcellular distribution of fluorescent fusion proteins in cells migrating within tissues. *Immunol Cell Biol*.
47. Bloembergen GV, O'Toole GA, Lugtenberg BJ, Kolter R (1997) Green fluorescent protein as a marker for *Pseudomonas* spp. *Appl Environ Microbiol* 63: 4543–4551.
48. Lee EJ, Cowell BA, Evans DJ, Fleiszig SM (2003) Contribution of ExxA-regulated factors to corneal infection by cytotoxic and invasive *Pseudomonas aeruginosa* in a murine scarification model. *Invest Ophthalmol Vis Sci* 44: 3892–3898.
49. Tam C, Mun JJ, Evans DJ, Fleiszig SM (2010) The impact of inoculation parameters on the pathogenesis of contact lens-related infectious keratitis. *Invest Ophthalmol Vis Sci* 51: 3100–3106.
50. Helmchen F, Denk W (2005) Deep tissue two-photon microscopy. *Nat Methods* 2: 932–940.
51. Chen WL, Chou CK, Lin MG, Chen YF, Jee SH, et al. (2009) Single-wavelength reflected confocal and multiphoton microscopy for tissue imaging. *J Biomed Opt* 14: 054026.
